# Supplementary material for: A strategy for fabrication of controllable 3D pattern containing clusters and nanoparticles inside a solid material
Source: Royal Society of Chemistry journal article supplement (doi:10.1039/c7nr01615h), 2017-01-01
Supplement: c7nr01615h1.pdf [file c7nr01615h1.pdf]

## Supplementary Information

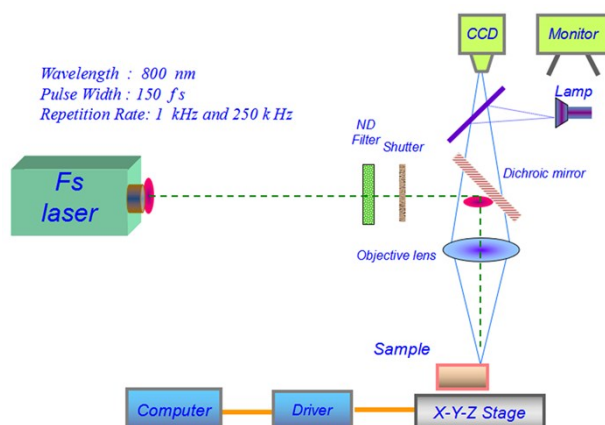

Fig. 1 Experimental setup for laser microfabrication.

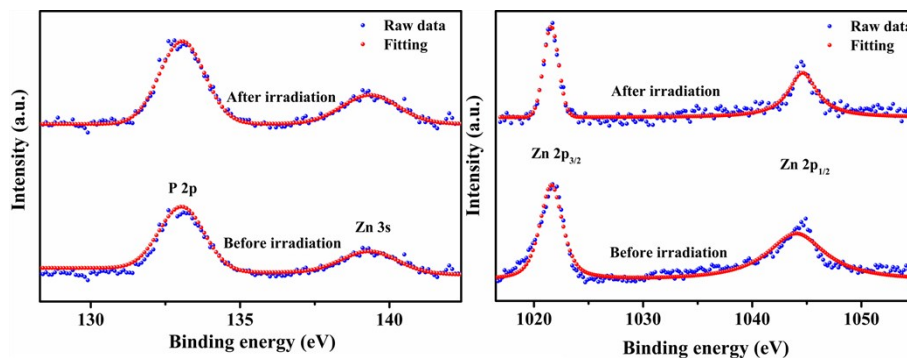

Fig. 2 High-resolution XPS spectra in the P 2p region and Zn 3p region.

The result of XPS shows that there is only one chemical state for Zn, P respectively before and after laser irradiation, which suggests that the laser mainly breaks the Te-O bonds, and no chemical reduction is occurred for Zn and P.
